# Supplementary material for: Nano-Sheet-like Morphology of Nitrogen-Doped Graphene-Oxide-Grafted Manganese Oxide and Polypyrrole Composite for Chemical Warfare Agent Simulant Detection
Source: MDPI journal article supplement (doi:10.3390/nano12172965), 2022-08-27
Supplement: s1 [file s1]

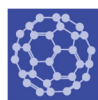

## Supplementary Materials

# Nano-Sheet-Like Morphology of Nitrogen-Doped Graphene-Oxide-Grafted Manganese Oxide and Polypyrrole Composite for Chemical Warfare Agent Simulant Detection

Sanjeeb Lama <sup>1</sup>, Bong-Gyu Bae <sup>1</sup>, Sivalingam Ramesh <sup>2</sup>, Young-Jun Lee <sup>1</sup>, Namjin Kim <sup>3</sup> and Joo-Hyung Kim <sup>1,\*</sup>

<sup>1</sup> Laboratory of Intelligent Devices and Thermal Control, Department of Mechanical Engineering, Inha University, Incheon 22212, Korea

<sup>2</sup> Department of Mechanical, Robotics and Energy Engineering, Dongguk University, Seoul 04620, Korea

<sup>3</sup> Department of Mechanical Engineering, Jeju National University, Jeju 63243, Korea

\* Correspondence: joohyung.kim@inha.ac.kr

## FIGURES:

|                                                                                                                                                                                                                                                                                                                      |    |
|----------------------------------------------------------------------------------------------------------------------------------------------------------------------------------------------------------------------------------------------------------------------------------------------------------------------|----|
| Figure S1. Chemical warfare agents (a) Sarin, (b) Soman, (c) Tabun, and its simulant (d) DMMP.                                                                                                                                                                                                                       | 5  |
| Figure S2. The chemical structure of (a) NGO@MnO <sub>2</sub> (b) NGO@MnO <sub>2</sub> /PPy. The figure is not to scale.                                                                                                                                                                                             | 6  |
| Figure S3. Schematic diagram of gas sensing system for QCM sensor.                                                                                                                                                                                                                                                   | 8  |
| Figure S4. Schematic diagram of gas sensing system for SAW sensor.                                                                                                                                                                                                                                                   | 9  |
| Figure S5. (a) QCM200 setup (digital controller, QCM crystals in Petri dish, crystal controller, and flow cell) (b) QCM flow cell (c) QCM signal monitoring program (d) Schematic of gas flow pattern in the flow cell.                                                                                              | 10 |
| Figure S6. (a) SAW sensor setup for the experimentation (b) Top view of the SAW sensor mounted on the test board (c) Front view of detection chamber with top cover for gas monitoring (d) Schematic of gas flow diagram in the detection chamber (e) SAW sensor monitoring program to check signals from SAW ports. | 11 |
| Figure S7. Schematic of (a) QCM crystal (SRS) (b) SAW sensor developed <i>in-house</i> .                                                                                                                                                                                                                             | 12 |
| Figure S8. (a), (b) FTIR analysis and (c), (d) XRD pattern, of NGO@MnO <sub>2</sub> (red), and NGO@MnO <sub>2</sub> /PPy (Green).                                                                                                                                                                                    | 13 |
| Figure S9. XPS analysis of NGO@MnO <sub>2</sub> .                                                                                                                                                                                                                                                                    | 14 |
| Figure S10. XPS analysis of NGO@MnO <sub>2</sub> /PPy.                                                                                                                                                                                                                                                               | 15 |
| Figure S11. FE-TEM images of NGO@MnO <sub>2</sub> with different magnifications.                                                                                                                                                                                                                                     | 16 |
| Figure S12. FE-TEM images of NGO@MnO <sub>2</sub> /PPy with different magnifications.                                                                                                                                                                                                                                | 16 |
| Figure S13. The effect of mass accumulation of (a) NGO@MnO <sub>2</sub> (b) NGO@MnO <sub>2</sub> /PPy on the QCM sensor (1) adsorption (2) desorption (3) regeneration ( $T = 20\text{ }^{\circ}\text{C}$ , R.H. = 25–30%).                                                                                          | 17 |
| Figure S14. Repeatability of (a) NGO@MnO <sub>2</sub> , and (b) NGO@MnO <sub>2</sub> /PPy in QCM sensor ( $T = 20\text{ }^{\circ}\text{C}$ , R.H. = 25–30%).                                                                                                                                                         | 18 |
| Figure S15. Response and recovery times of (a) NGO@MnO <sub>2</sub> (b) NGO@MnO <sub>2</sub> /PPy in detection of 75 ppm DMMP ( $T = 20\text{ }^{\circ}\text{C}$ , R.H. = 25–30%).                                                                                                                                   | 19 |
| Figure S16. Repeatability of (a) NGO@MnO <sub>2</sub> , and (b) NGO@MnO <sub>2</sub> /PPy in SAW sensor ( $T = 20\text{ }^{\circ}\text{C}$ , R.H. = 25–30%).                                                                                                                                                         | 22 |
| Figure S17. Response and recovery times of (a) NGO@MnO <sub>2</sub> , and (b) NGO@MnO <sub>2</sub> /PPy in SAW sensor ( $T = 20\text{ }^{\circ}\text{C}$ , R.H. = 25–30%).                                                                                                                                           | 23 |
| Figure S18. The effect of different R.H. conditions on the SAW sensor coated with NGO@MnO <sub>2</sub> /PPy under 25–30, 60–65, and 85–90% R.H. conditions at 20 °C for 75 and 150 ppm DMMP.                                                                                                                         | 26 |
| Figure S19. The stability test of NGO@MnO <sub>2</sub> /PPy for the detection of 150 ppm DMMP for five consecutive days.                                                                                                                                                                                             | 27 |

**TABLES:**

|                                                                           |    |
|---------------------------------------------------------------------------|----|
| Table S1. List of acronyms.                                               | 4  |
| Table S2. Coefficients used for various vapors in this study [1–5].       | 7  |
| Table S3. Summary of sensing materials and its performance in QCM sensor. | 20 |
| Table S4. Summary of sensing materials and its performance in SAW sensor. | 24 |

**Table S1.** List of acronyms.

| Acronyms                       | Definition                              | Acronyms   | Definition                                      |
|--------------------------------|-----------------------------------------|------------|-------------------------------------------------|
| CWAs                           | Chemical warfare agents                 | IPA        | Isopropyl alcohol                               |
| QCM                            | Quartz Crystal Microbalance             | sccm       | standard cubic centimeters per minute           |
| SAW                            | Surface Acoustic Wave                   | MFCs       | Mass Flow Controllers                           |
| DMMP                           | Dimethyl methyl phosphonate             | ppm        | parts per million                               |
| NGO                            | Nitrogen doped Graphene Oxide           | $F_c$      | Carrier gas flow rate                           |
| MnO <sub>2</sub>               | Manganese dioxide                       | $P_o$      | Outlet pressure                                 |
| PPy                            | Polypyrrole                             | $P_{th}$   | Thermodynamic pressure                          |
| VOCs                           | Volatile Organic Compounds              | $P_s$      | Saturated vapor pressure                        |
| MEMS                           | Micro-electromechanical system          | $F_d$      | dilution gas flow rate                          |
| CO <sub>3</sub> O <sub>4</sub> | Cobalt oxide                            | SRS        | Stanford Research System                        |
| R.H.                           | Relative Humidity                       | VNA        | Vector Network Analyzer                         |
| ZnO                            | Zinc Oxide                              | SMA        | SubMiniature Version A Connector                |
| M.W.                           | Molecular weight                        | $\Delta f$ | Resonant frequency                              |
| FTIR                           | Fourier Transform Infrared Spectroscopy | $C_f$      | Sensitivity factor                              |
| XRD                            | X-Ray Diffraction                       | $\Delta m$ | mass change                                     |
| XPS                            | X-ray Photoelectron Spectroscopy        | IDTs       | Interdigital Transducers                        |
| SEM                            | Scanning Electron Microscopy            | $F_c$      | Central frequency                               |
| TEM                            | Transmission Electron Microscopy        | $v$        | Velocity                                        |
| H <sub>2</sub> O <sub>2</sub>  | Hydrogen peroxide                       | $\lambda$  | Wavelength                                      |
| DD                             | Double distilled water                  | FE-SEM     | Field Emission Scanning Electron Microscopy     |
| NaNO <sub>3</sub>              | Sodium Nitrate                          | FE-TEM     | Field Emission Transmission Electron Microscopy |
| H <sub>2</sub> SO <sub>4</sub> | Sulfuric acid                           | EDX        | Energy Dispersive X-Ray Analysis                |
| KOH                            | Potassium hydroxide                     | $R^2$      | Coefficient of determination                    |
| FeCl <sub>3</sub>              | Ferric chloride                         | $D$        | Coefficient of variation                        |
| KMnO <sub>4</sub>              | Potassium permanganate                  | $\delta$   | Standard deviation ( $\delta$ )                 |
| NH <sub>4</sub> OH             | Ammonium hydroxide                      | $k$        | Average                                         |
| PTFE                           | PTFE = Polytetrafluorethylene           | $T_{90}$   | response time to attain 90 % of the equilibrium |

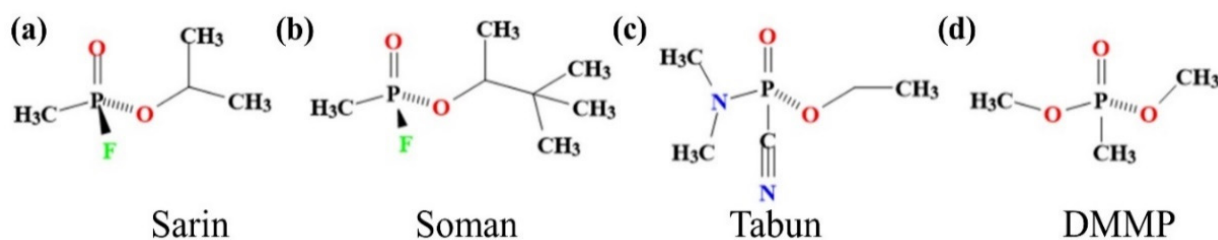

**Figure S1.** Chemical warfare agents (a) Sarin, (b) Soman, (c) Tabun, and its simulant (d) DMMP.

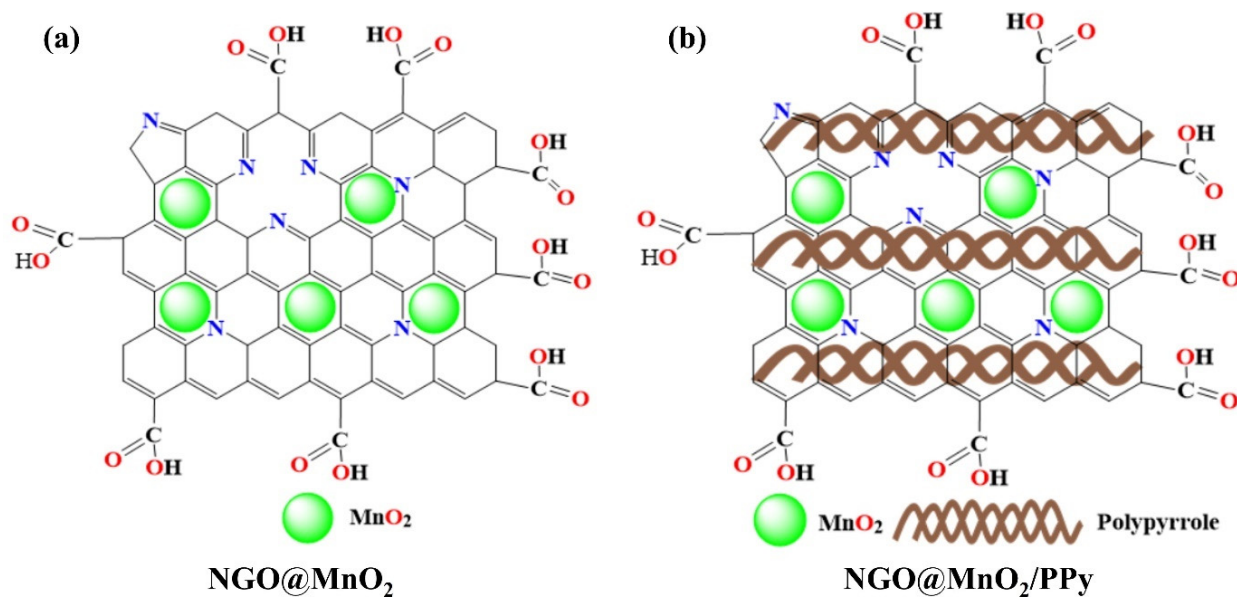

**Figure S2.** The chemical structure of (a) NGO@MnO<sub>2</sub> (b) NGO@MnO<sub>2</sub>/PPy. The figure is not to scale.

**Table S2.** Coefficients used for various vapors in this study [1–5].

| Vapors   | Equation | Unit                 | A        | B       | C       | Temp. Range [K] |
|----------|----------|----------------------|----------|---------|---------|-----------------|
| DMMP     | (2)      | $T$ (K), $P$ (Pa)    | 22.31900 | 4340.00 | -51.700 | 263.2–453.8     |
| Ethanol  | (3)      | $T$ (K), $P$ (kPa)   | 7.24739  | 1599.04 | -46.391 | 292.8–366.6     |
| N-hexane | (3)      | $T$ (°C), $P$ (mmHg) | 6.87776  | 1171.53 | 224.366 | 286.2–342.7     |
| Water    | (3)      | $T$ (K), $P$ (bar)   | 5.40221  | 1838.67 | -31.737 | 273.0–303.0     |
| Toluene  | (3)      | $T$ (°C), $P$ (mmHg) | 6.95464  | 1344.80 | 219.482 | 279.0–409.0     |
| Methanol | (3)      | $T$ (°C), $P$ (mmHg) | 8.07240  | 1574.99 | 238.870 | 257.0–364.0     |

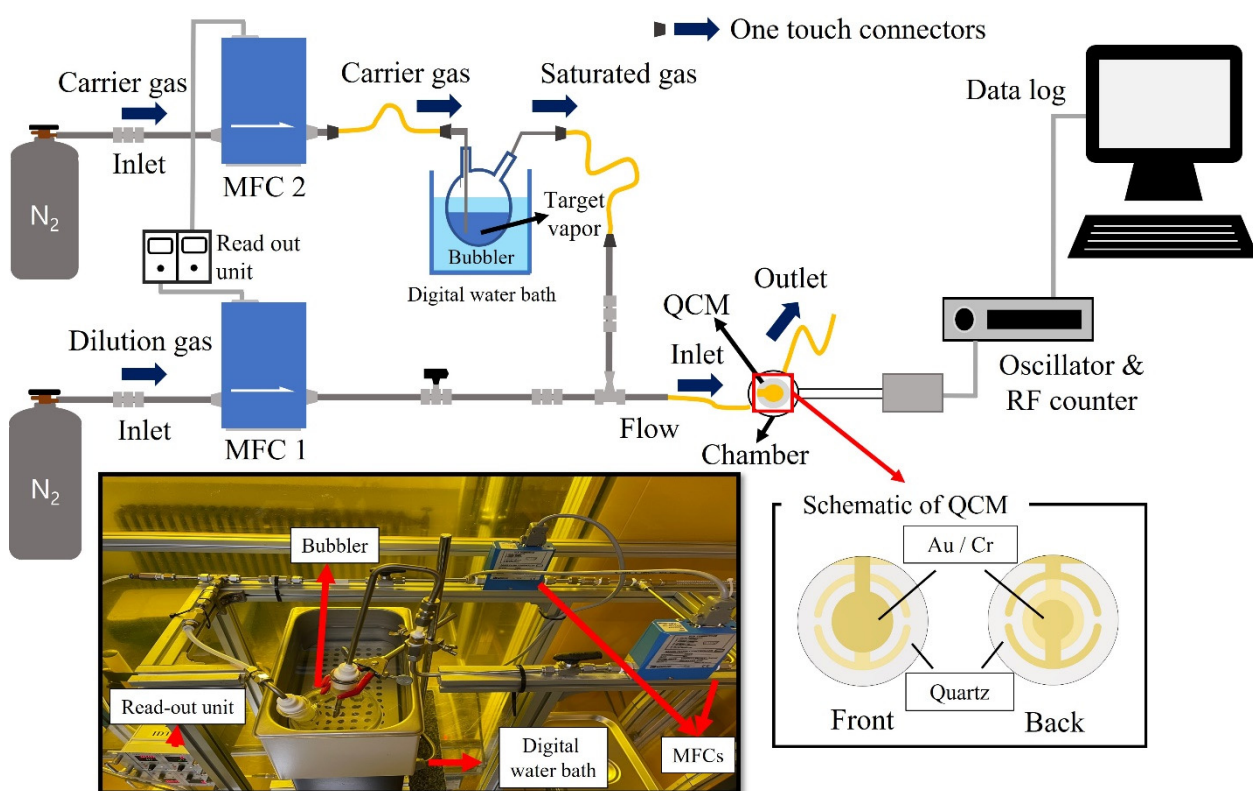

**Figure S3.** Schematic diagram of gas sensing system for QCM sensor.

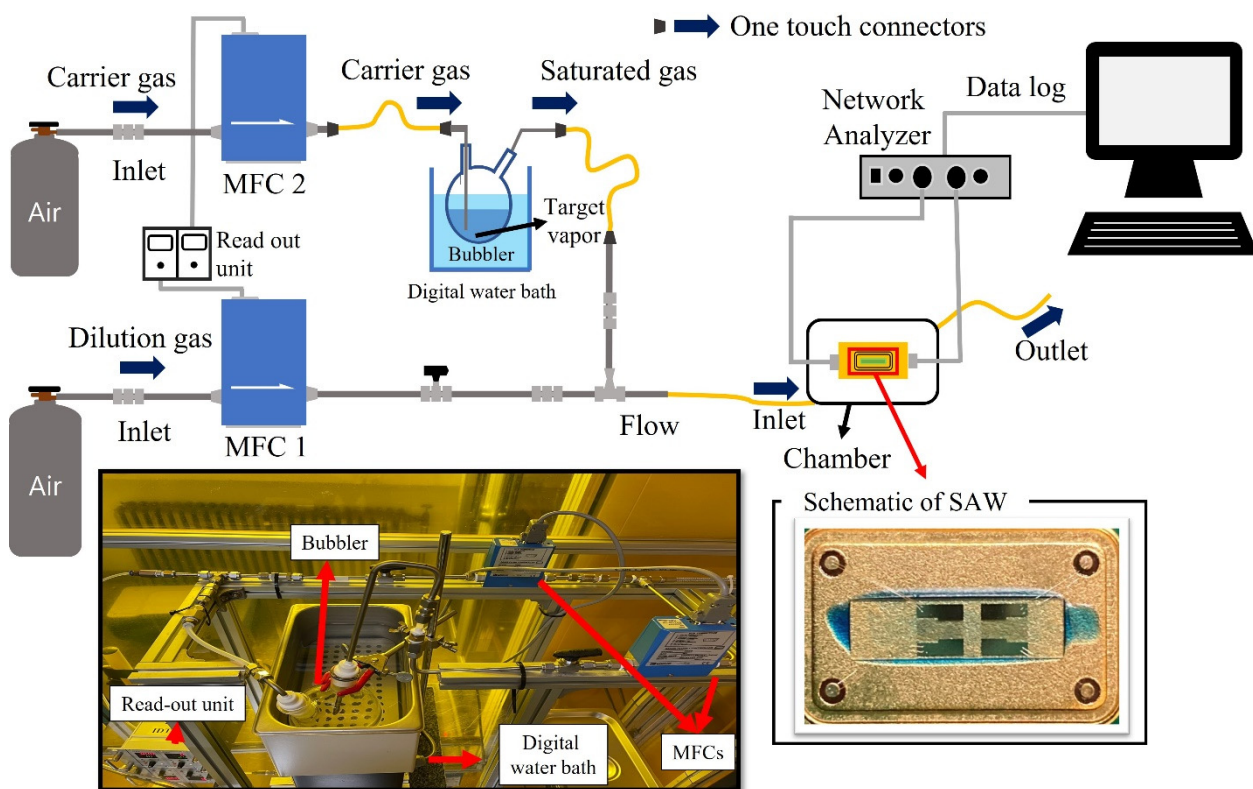

**Figure S4.** Schematic diagram of gas sensing system for SAW sensor.



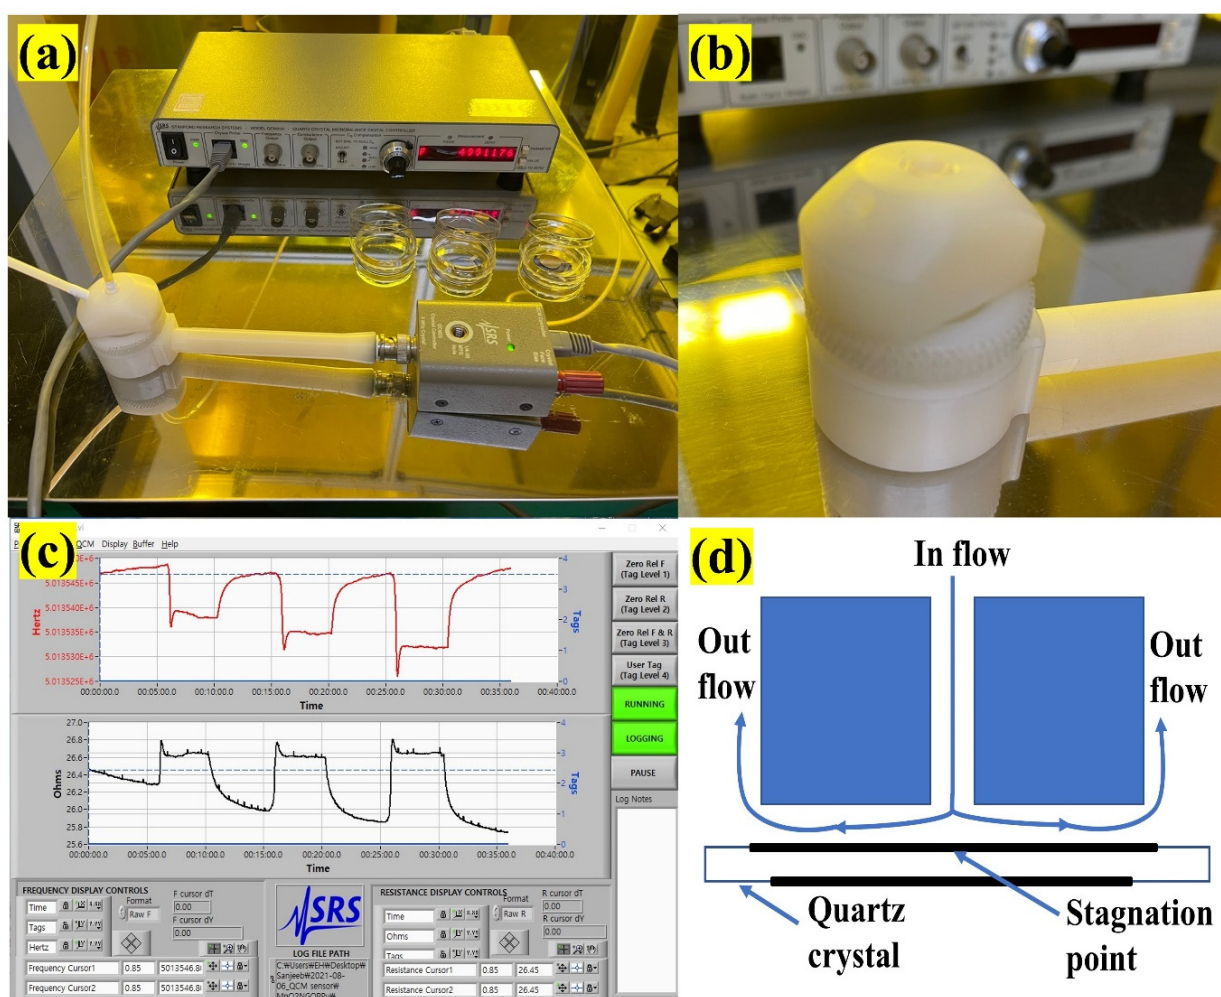

**Figure S5.** (a) QCM200 setup (digital controller, QCM crystals in Petri dish, crystal controller, and flow cell) (b) QCM flow cell (c) QCM signal monitoring program (d) Schematic of gas flow pattern in the flow cell.

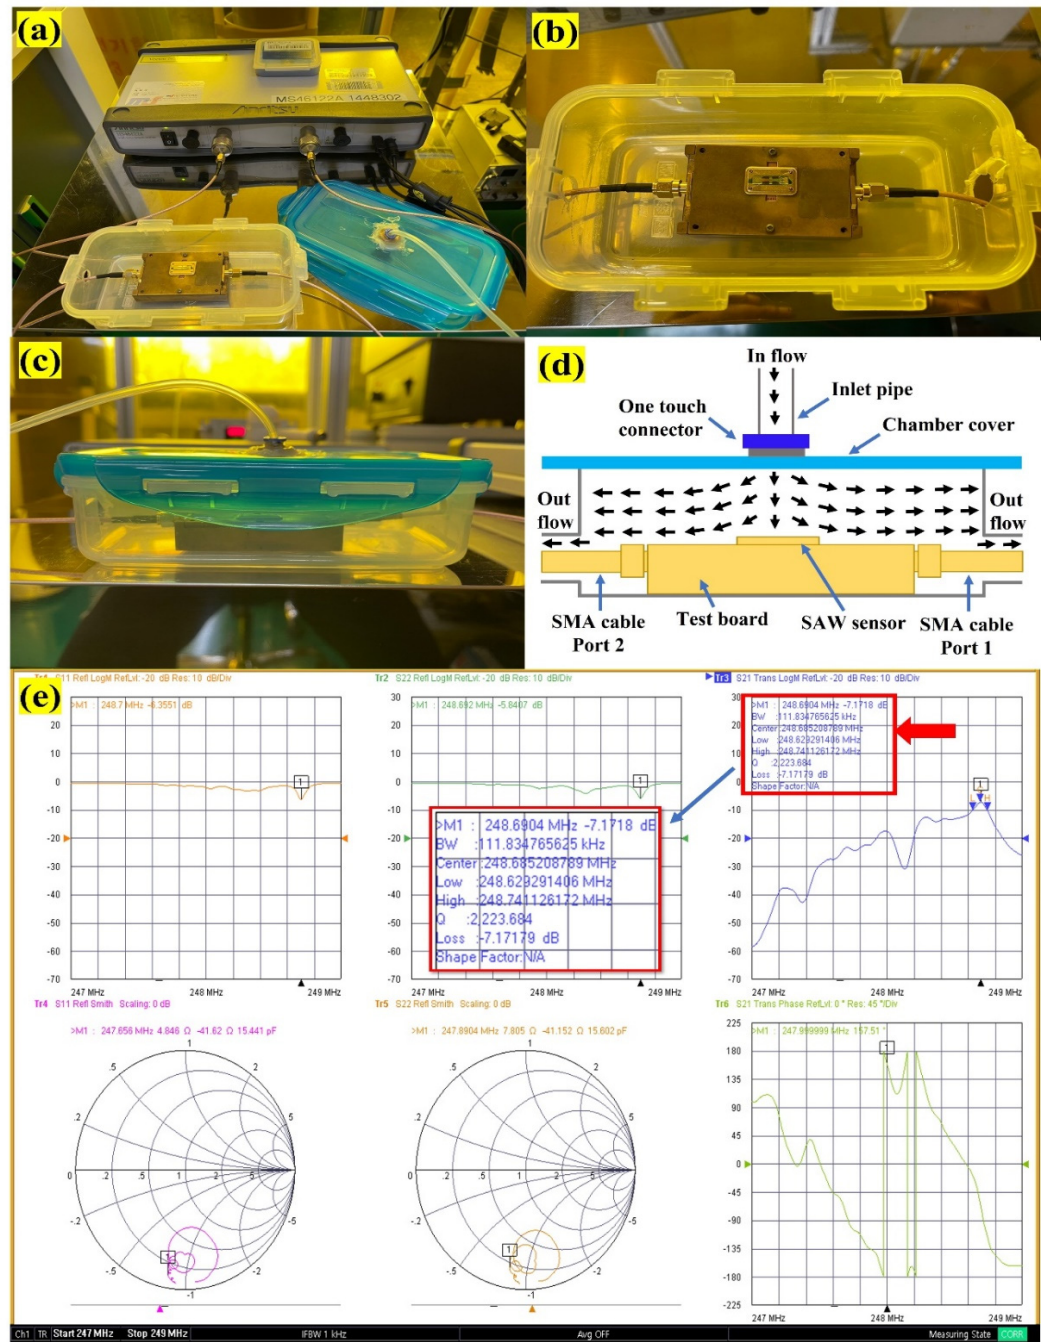

**Figure S6.** (a) SAW sensor setup for the experimentation (b) Top view of the SAW sensor mounted on the test board (c) Front view of detection chamber with top cover for gas monitoring (d) Schematic of gas flow diagram in the detection chamber (e) SAW sensor monitoring program to check signals from SAW ports.

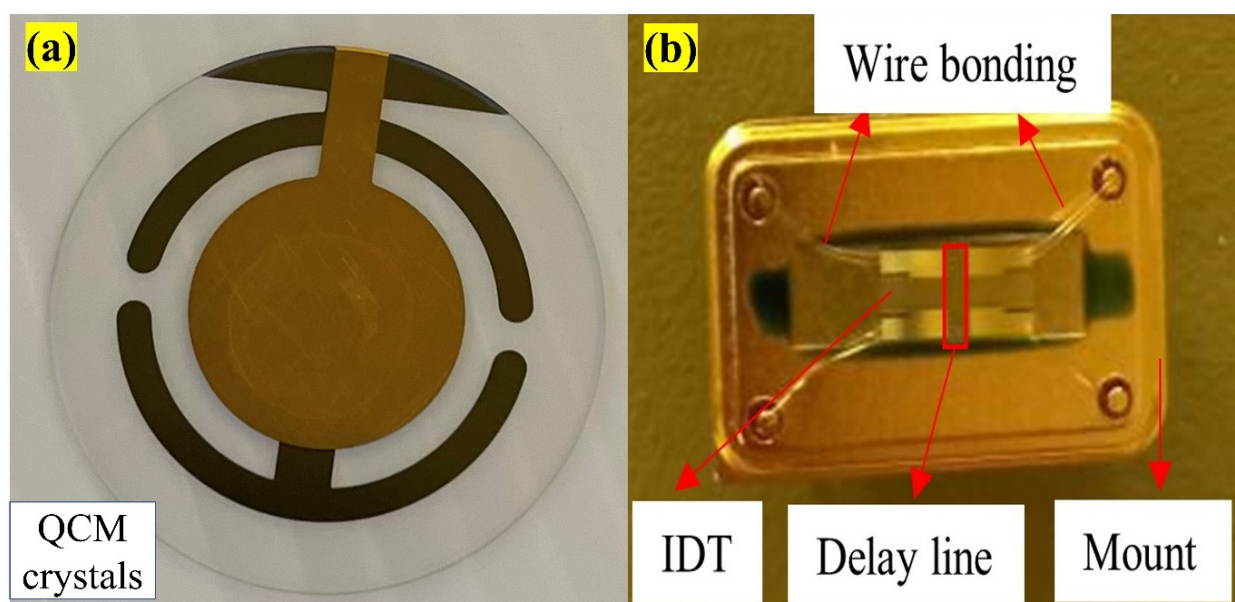

Figure S7. Schematic of (a) QCM crystal (SRS) (b) SAW sensor developed *in-house*.

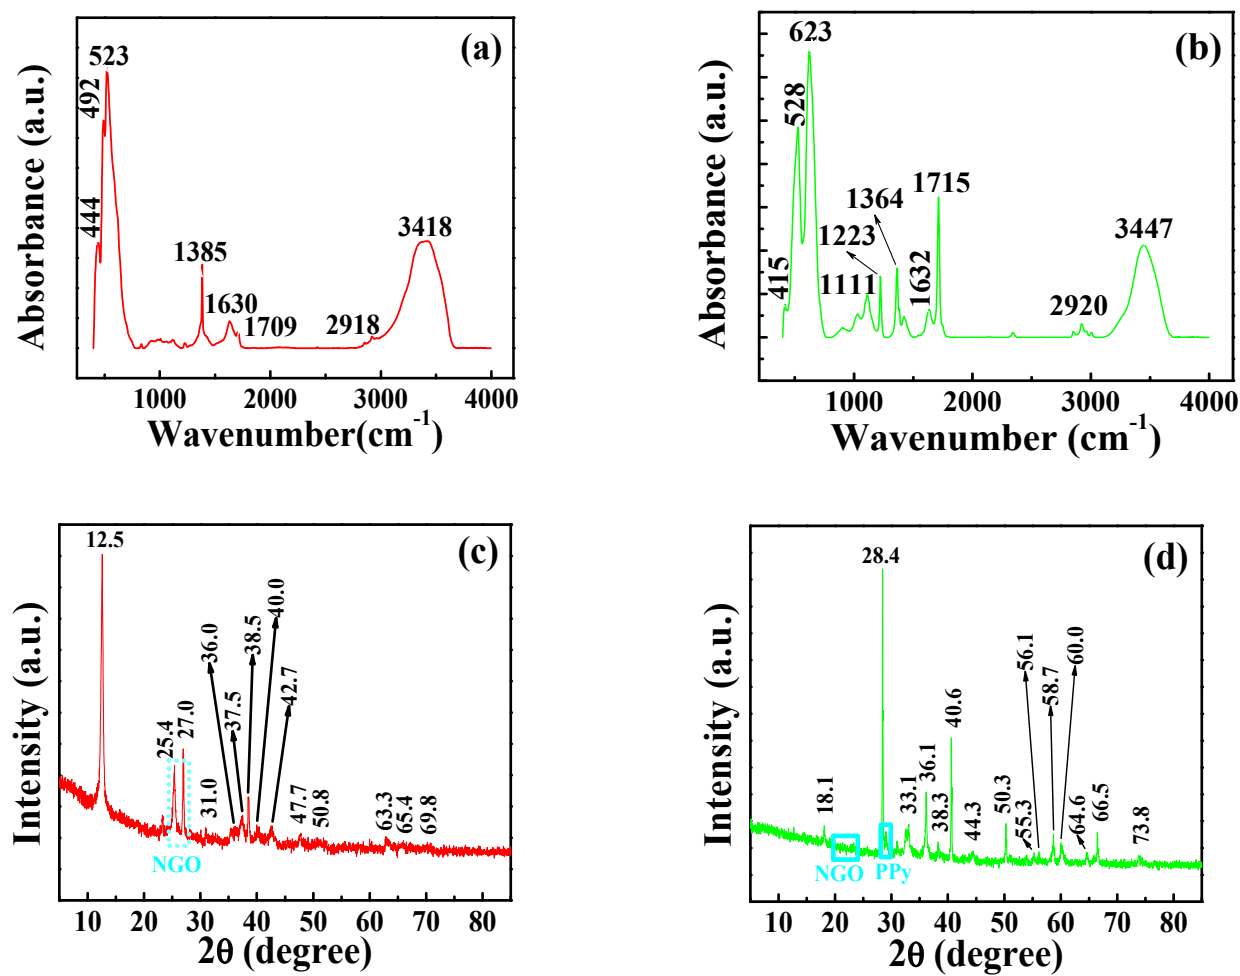

Figure S8. (a,b) FTIR analysis and (c,d) XRD pattern, of NGO@MnO<sub>2</sub> (red), and NGO@MnO<sub>2</sub>/PPy (Green).



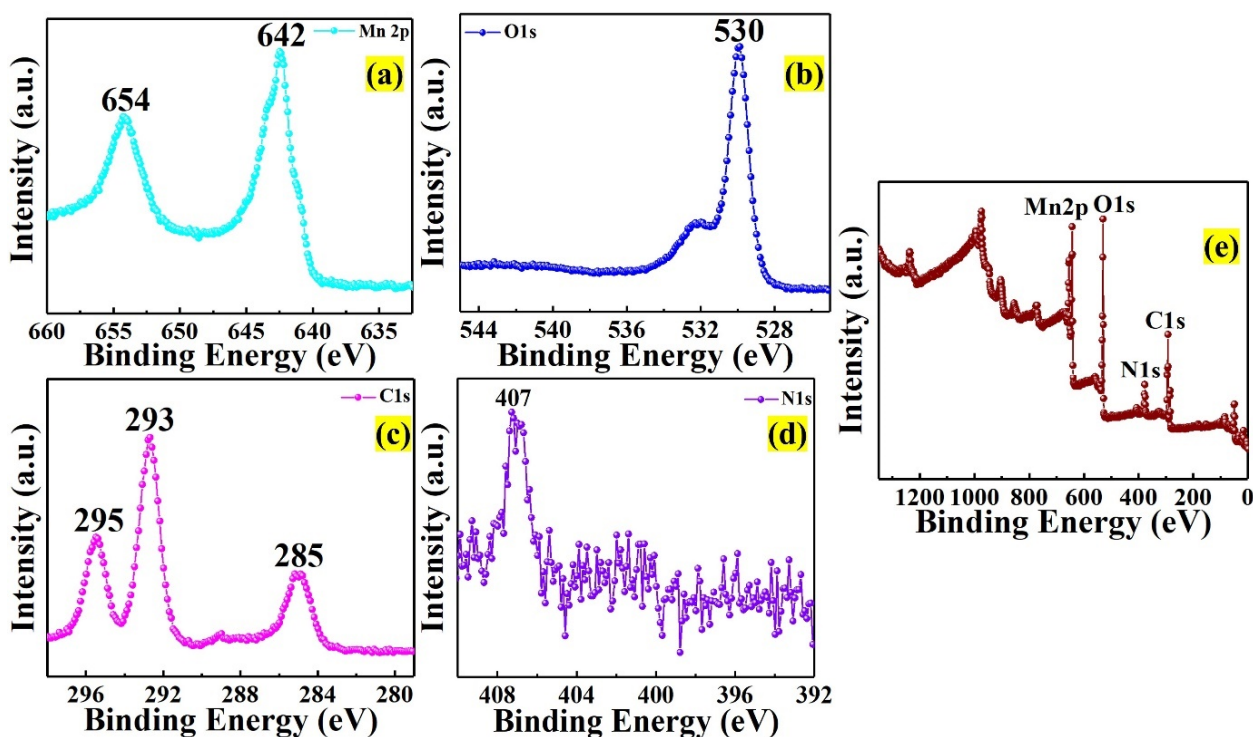

Figure S9. XPS analysis of NGO@MnO<sub>2</sub> composite. (a) Mn 2p, (b) O 1s, (c) C 1s and (d) N 1s binding energy and (e) survey spectrum.

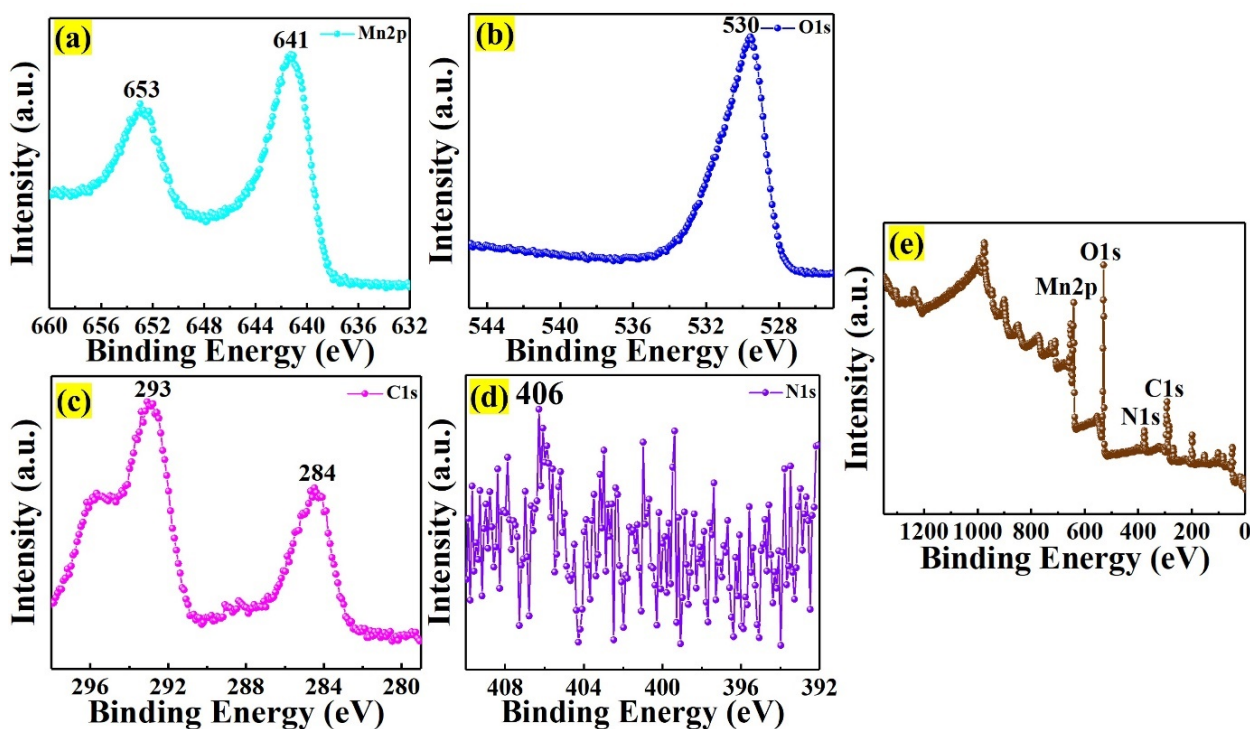

Figure S10. XPS analysis of NGO@MnO<sub>2</sub>/PPy composites. (a) Mn 2p, (b) O 1s, (c) C 1s and (d) N 1s binding energy and (e) survey spectrum.



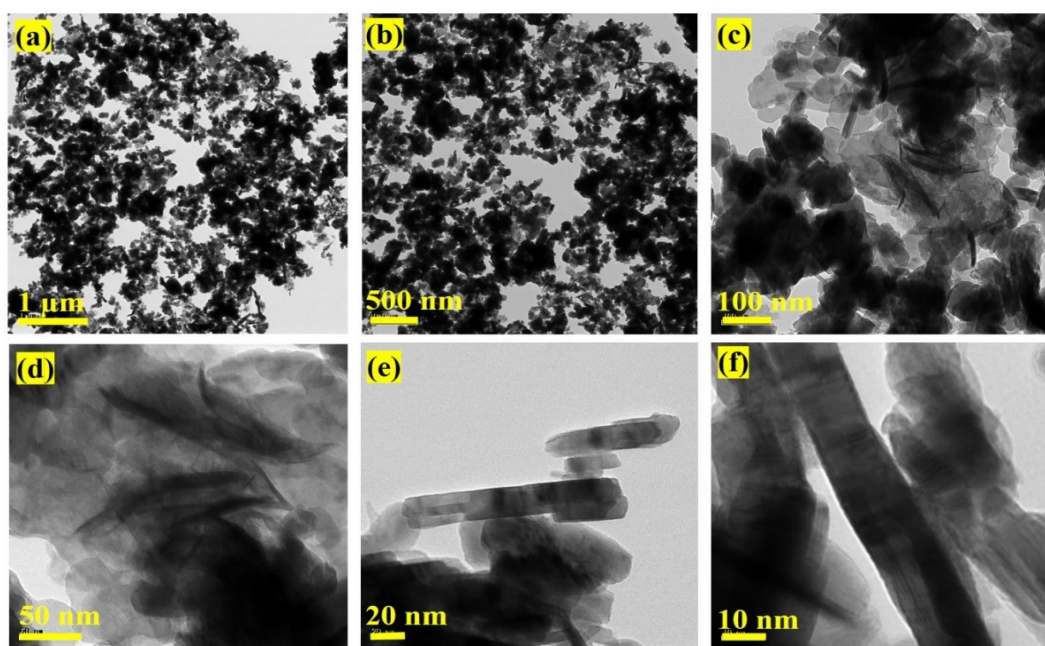

**Figure S11.** FE-TEM images of NGO@MnO<sub>2</sub> at the magnification of (a) 1  $\mu\text{m}$ , (b) 500 nm, (c) 100 nm (d) 50 nm, (e) 20 nm, and (f) 10 nm.

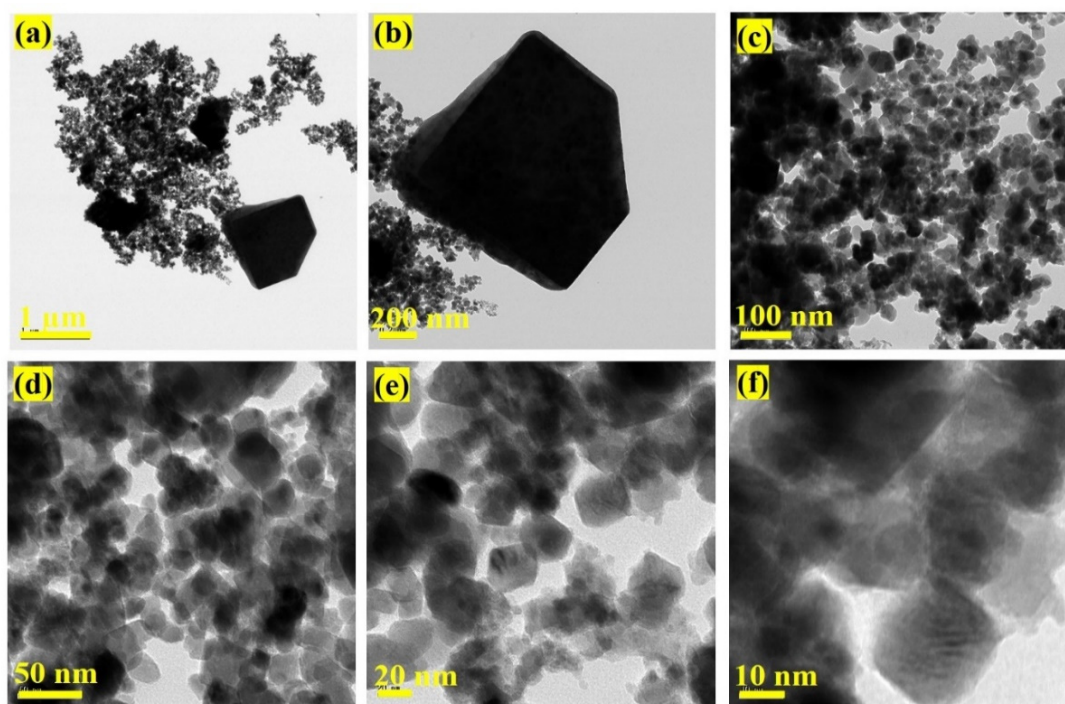

**Figure S12.** FE-TEM images of NGO@MnO<sub>2</sub>/PPy at the magnification of (a) 1  $\mu\text{m}$ , (b) 200 nm, (c) 100 nm (d) 50 nm, (e) 20 nm, and (f) 10 nm.

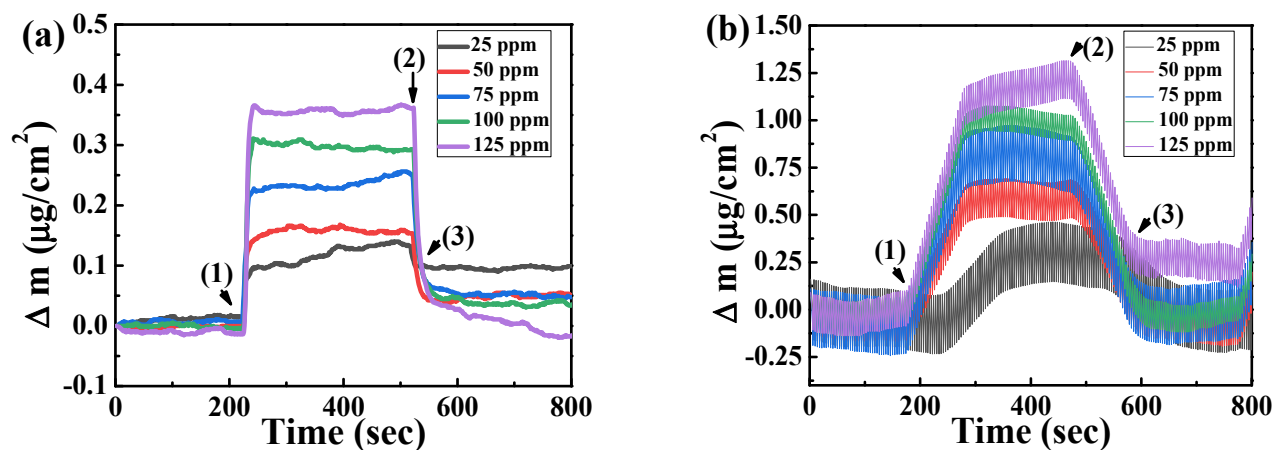

**Figure S13.** The effect of mass accumulation of (a) NGO@MnO<sub>2</sub> (b) NGO@MnO<sub>2</sub>/PPy on the QCM sensor (1) adsorption (2) desorption (3) regeneration ( $T = 20\text{ }^{\circ}\text{C}$ , R.H. = 25–30%).

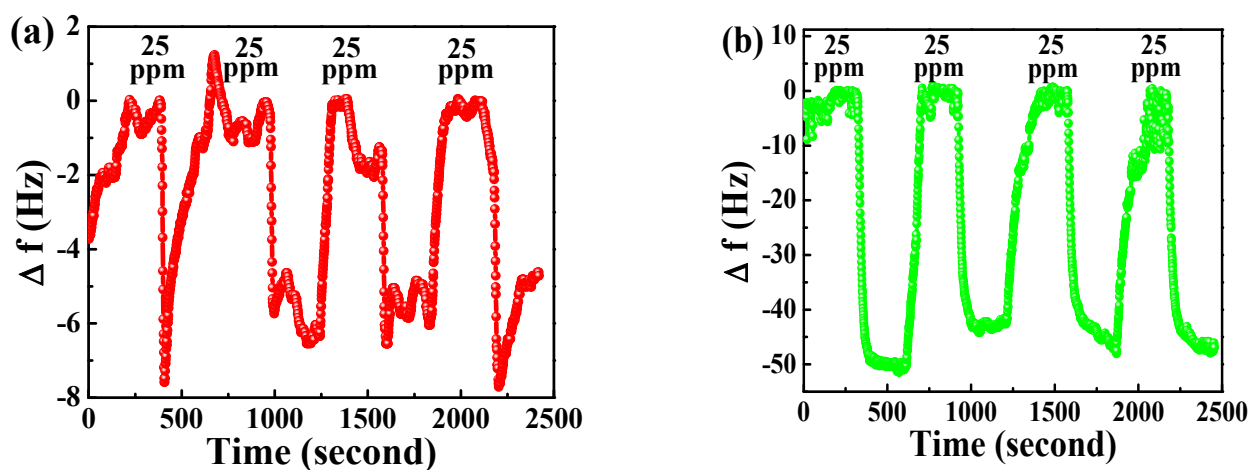

**Figure S14.** Repeatability of (a) NGO@MnO<sub>2</sub>, and (b) NGO@MnO<sub>2</sub>/PPy in QCM sensor ( $T = 20\text{ }^{\circ}\text{C}$ , R.H. = 25–30%).

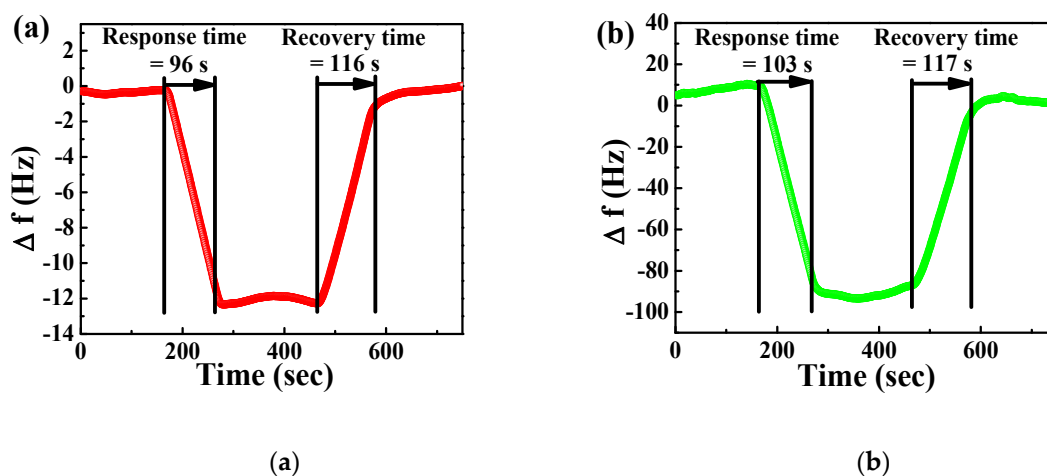

**Figure S15.** Response and recovery times of (a) NGO@MnO<sub>2</sub> (b) NGO@MnO<sub>2</sub>/PPy in detection of 75 ppm DMMP ( $T = 20\text{ }^{\circ}\text{C}$ , R.H. = 25–30%).

**Table S3.** Summary of sensing materials and its performance in QCM sensor.

| Ref.      | Sensing Materials                                      | Concentration         | Response (Hz) | Response Time (s) | Recovery Time (s)  |
|-----------|--------------------------------------------------------|-----------------------|---------------|-------------------|--------------------|
| [6]       | Acetylcholinesterase                                   | 20 mg/m <sup>3</sup>  | ~4.5          | -                 | -                  |
| [7]       | HFIPP-GR                                               | 5 ppm                 | 71 ± 4        | $T_{80} < 108$    | $T_{80} = 600$     |
| [8]       | PMDFPS                                                 | 40 ppm                | ~600          | -                 | -                  |
| [9]       | WO <sub>3</sub> nanoflakes                             | 3.91 ppm              | <160          | 30                | 73                 |
| [10]      | WO <sub>3</sub> particles                              | 4 ppm                 | 281           | 153               | -                  |
| [11]      | Cu-ZSM-5 (5)                                           | 40 ppm                | ~410          | $T_{80} < 100$    | $T_{90} > 1800$    |
| [12]      | ZnPcs-HF <sub>4</sub> O-Cl (1b)                        | 12 ppm                | ~175          | $T_{90} = 1080$   | -                  |
| [13]      | TiO <sub>2</sub>                                       | 10 ppm                | ~45           | 27                | 31                 |
| [14]      | MIP                                                    | 100 ppm               | ~80           | -                 | -                  |
| [15]      | TiO <sub>2</sub> -SiO <sub>2</sub> -HFIP (S4)          | 60 ppm                | ~575          | < 60              | < 60               |
| [16]      | U3/SBA-15                                              | 1 ppm                 | 398           | 44                | 66                 |
| [17]      | ZSM-5 zeolite                                          | 20 ppm                | 120           | < 100             | -                  |
| [18]      | Ag <sup>+</sup> ZSM-5                                  | 5 ppm                 | 35            | < 80              | -                  |
| [19]      | Hexafluoroisopropanol functionalized siloxane          | 50 ppm                | ~1150         | $T_{80} = 90$     | ~175               |
| [20]      | ZrO <sub>2</sub> particles                             | 1.5 ppb               | ~32.5         | 20                | 40                 |
| [21]      | TU-4                                                   | 60 ppm                | 3910          | -                 | -                  |
| [22]      | HFIP/SBA-15                                            | 60 ppm                | ~1600         | -                 | -                  |
| [23]      | Co <sub>3</sub> O <sub>4</sub> @gold /MWCNT/ PPy       | 60 ppm                | 90            | $T_{98} = 60$     | $T_{98} = 493$     |
| [24]      | TU13                                                   | 60 ppm                | 3200          | -                 | -                  |
| [25]      | PMTFMPS                                                | 50 ppm                | ~1400         | $T_{80} = 60-80$  | 170                |
| [26]      | Nano-SnO <sub>2</sub>                                  | 5 ppm                 | 450           | ~10               | -                  |
| [27]      | BHPHFP functionalized MCM-41                           | 140 ppb               | ~60           | -                 | -                  |
| [28]      | V <sub>2</sub> O <sub>5</sub> coated ZnO nanorods (S4) | 15 ppm                | ~40           | $T_{80} < 300$    | $T_{80} > 900$     |
| [29]      | PVDF                                                   | 300 ppm               | ~145          | ~60               | ~60                |
| [30]      | POSS                                                   | 120 ppm               | ~2500         | -                 | -                  |
| [31]      | Fluorosiloxane                                         | 150 mg/m <sup>3</sup> | ~220          | -                 | -                  |
| [32]      | Vic-Dioximes (O4C)                                     | 12 ppm                | ~3000         | $T_{90} \sim 780$ | $T_{90} \sim 1200$ |
| [33]      | ZnO-modified NW- structured MnO <sub>2</sub>           | 1.75 ppm              | ~200          | 300               | 400                |
| [34]      | Hollow Ball-Like Nano-Fe <sub>2</sub> O <sub>3</sub>   | 4 ppm                 | 115           | 25                | -                  |
| [35]      | NSrGO-HFHPB (1:4)                                      | 60 ppm                | 83            | $T_{98} = 22$     | $T_{98} = 27$      |
| [36]      | HFHPB-GQD                                              | 4 ppm                 | ~10           | $T_{90} = 31$     | $T_{90} = 34$      |
| [37]      | PVDF                                                   | 40 ppm                | ~140          | -                 | -                  |
| This work | NGO@MnO <sub>2</sub>                                   | 75 ppm                | 14            | $T_{90} = 96$     | $T_{90} = 116$     |
|           | NGO@MnO <sub>2</sub> /PPy                              |                       | 107           | $T_{90} = 103$    | $T_{90} = 117$     |

Table S3 summarizes the various sensing materials and their performance in a QCM sensor. From this table, we observe that the NGO@MnO<sub>2</sub>/PPy shows similar or greater frequency response compared to the materials given in Refs. [14,23,29,35,37], similar or shorter response time compared to the materials given in Refs. [7,10–12,19,25,28,32,33], and similar or shorter recovery time compared to the materials given in Refs. [7,11,19,23,25,28,32,33]. This excellent performance of NGO@MnO<sub>2</sub>/PPy may arise from the increased surface area, higher conductivity from  $\pi$ -electron conjugation, the formation of hydrogen bond or Van der Waals forces, and good cohesive contact between the materials and electrodes [38–46]. The present work is not comparable to the reported works in the literature [7,9,10,12,13,16,18,20,26,27,32–34,36] in terms of frequency responses since

they all tested the materials in relatively lower concentrations. It is also important to note here that the present work is focused in DMMP detection ranging from 25 to 150 ppm. To add more to the comparisons, we notice the following. For the case of response time, some works [9,13,20,26,34,35] in the literature reported very fast response times ( $\leq 30$  s) while some others showed the long response at low ppm and the short response at high ppm [8]. Response times of  $5 \text{ min} \leq T_{\text{response}} < 10 \text{ min}$  [24,28,31,33,37], and  $\geq 10 \text{ min}$  [12,14,27,32] were also reported in the literature. Similar observation is also made for the recovery times. Some of the sensing materials exhibited fast recovery ( $\leq 40$  s) [13,20,35,36], whereas some other materials exhibited long recovery times of  $5 \text{ min} \leq T_{\text{recovery}} < 10 \text{ min}$  [23,24,31,33,37] and  $\geq 10 \text{ min}$  [7,11,12,14,27,28,32]. The literature also reports an incomplete recovery [10], and a case in which it was difficult to desorb [17].

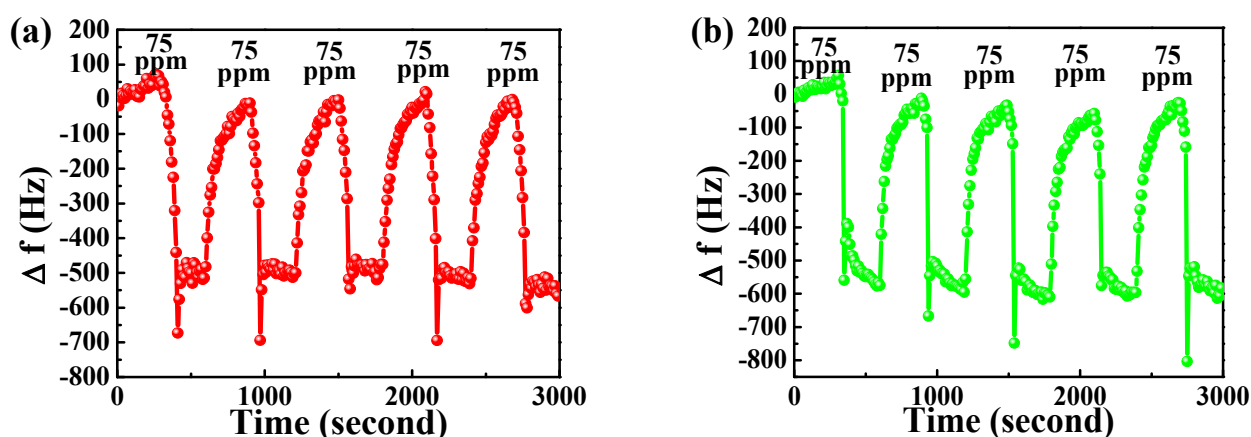

**Figure S16.** Repeatability of (a) NGO@MnO<sub>2</sub>, and (b) NGO@MnO<sub>2</sub>/PPy in SAW sensor ( $T = 20^\circ\text{C}$ , R.H. = 25–30%).

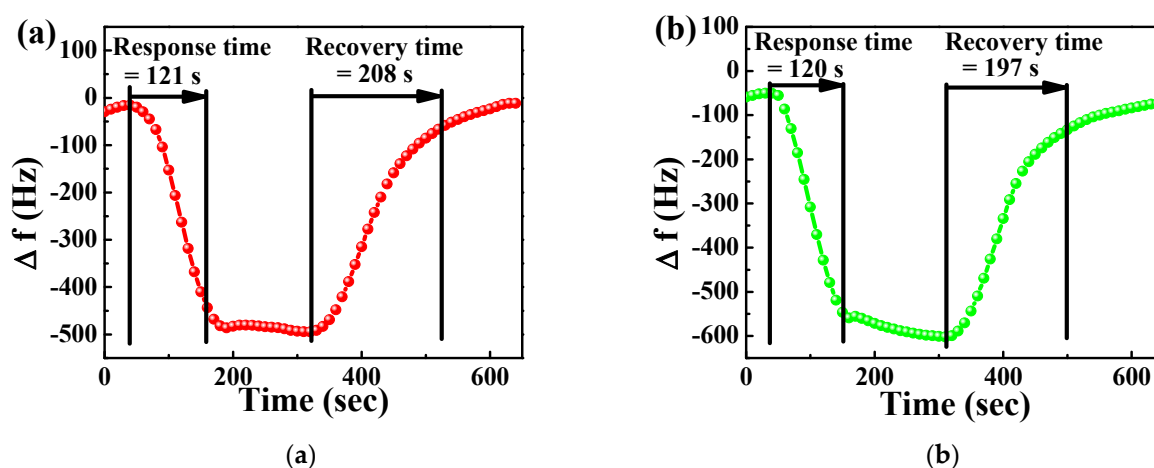

**Figure S17.** Response and recovery times of (a) NGO@MnO<sub>2</sub>, and (b) NGO@MnO<sub>2</sub>/PPy in SAW sensor ( $T = 20^\circ\text{C}$ , R.H. = 25–30%).



**Table S4.** Summary of sensing materials and its performance in SAW sensor.

| Ref.      | Sensing Materials                                | Center Frequency (MHz) | Concentration          | Response (Hz) | Response Time (s) | Recovery Time (s) |
|-----------|--------------------------------------------------|------------------------|------------------------|---------------|-------------------|-------------------|
| [47]      | PMPS                                             | 434                    | 20 ppm                 | ~150,000      | $T_{80} \sim 30$  | -                 |
| [48]      | Diamond nanoparticles                            | 433                    | 0.5 ppm                | 2400          | ~60               | -                 |
| [49]      | PIB                                              | 264                    | 5 ppm                  | 5369          | -                 | -                 |
| [50]      | MIP                                              | 300                    | 50 mg/m <sup>3</sup>   | 14000         | 1200              | 1200              |
| [51]      | PCPMS                                            | 157                    | 1 ppm                  | ~ 2300        | 300-600           | 1800              |
| [52]      | Carbowax                                         | 163                    | 1 ppm                  | ~ 14,000      | $T_{50} \sim 60$  | $T_{50} \sim 240$ |
| [53]      | SnO <sub>2</sub>                                 | 433.9                  | 50 ppm                 | 4210          | -                 | -                 |
| [54]      | ZnO                                              | 433.9                  | 100 ppb                | 355           | -                 | -                 |
| [55]      | ZnO (80 nm)                                      | 433.9                  | 1600 ppm               | 52,000        | 37                | 720               |
| [56]      | SXFA (24 °C)                                     | 150                    | 5.0 mg/m <sup>3</sup>  | 5833          | 20                | 37                |
| [57]      | PMFOS                                            | 194                    | 10 ppm                 | 6400          | -                 | -                 |
| [58]      | SXFA                                             | 433.9                  | 10 ppm                 | 8070          | -                 | -                 |
| [59]      | Bisphenol                                        | 70                     | 0.5 ppm                | 700           | 15                | -                 |
| [60]      | SXFA                                             | 150                    | 200 mg/m <sup>3</sup>  | ~38,000       | $T_{75} = 300$    | $T_{75} < 1200$   |
| [61]      | ZnO QDs                                          | 150                    | 91 ppm                 | ~3000         | ~120              | ~120              |
| [62]      | DKAP                                             | 434                    | 20 mg/m <sup>3</sup>   | ~80,000       | $T_{80} \sim 40$  | $T_{80} \sim 25$  |
| [63]      | Calixarene (20 °C)                               | 300                    | 20 mg/m <sup>3</sup>   | 2150          | 174               | 80                |
| [64]      | Polymer 4                                        | 500                    | 0.5 mg/m <sup>3</sup>  | 3629          | 300               | -                 |
| [65]      | 25-(thioalkyl-alkoxy)-p-tertbutylcalix [4] arene | 300                    | 5 mg/m <sup>3</sup>    | 6041          | 229               | -                 |
| [66]      | HB-PE-COOH 2                                     | 500                    | 0.05 ppm               | 5292          | 300               | 300               |
| [67]      | 1-benzyl-3-phenylthiourea                        | 250                    | 98.6 ppm               | 51,200        | 260               | 470               |
| [68]      | Graphene/PVDF                                    | 433                    | 10 ppm                 | ~ 30,000      | $T_{90} \sim 4.5$ | $T_{90} \sim 5.8$ |
| [69]      | SXFA                                             | 158                    | 1000 mg/m <sup>3</sup> | ~ 35,000      | 10                | <10               |
| [70]      | PLF                                              | 434                    | 1 mg/m <sup>3</sup>    | 3100          | $T_{80} < 50$     | 180               |
| [71]      | PEI with AchE                                    | ~ 69                   | 6 ppm                  | 65,000        | 90-100            | -                 |
| [72]      | POSS                                             | 250                    | 507 mg/m <sup>3</sup>  | 12,600        | $T_{80} = 22$     | -                 |
| [73]      | LSFA                                             | 434                    | 1 mg/m <sup>3</sup>    | 10,000        | $T_{80} < 20$     | -                 |
| [74]      | LaBHA                                            | 78                     | 5 ppm                  | 140           | $T_{80} = 240$    | $T_{80} = 780$    |
| This work | NGO@MnO <sub>2</sub>                             | 250                    | 150 ppm                | 1129          | $T_{90} = 121$    | $T_{90} = 208$    |
|           | NGO@MnO <sub>2</sub> /PPy                        |                        |                        | 1546          | $T_{90} = 120$    | $T_{90} = 197$    |

Table S4 summarizes the various sensing materials and their performance in a SAW sensor. The composite materials that we have developed are compared to other sensing materials in SAW sensors to find that the fabricated composite materials excelled with similar or shorter response time than the materials in the Refs. [50–53,57,60,63–67,74] and similar or shorter recovery time than the materials in the Refs. [47,50,51–55,57,60,65–67,72,74]. This exceptional response of the fabricated materials may have resulted from the sensitive behavior of MnO<sub>2</sub>, NGO, and PPy, increment of free and mobile hole charge carriers, increased surface area, and the formation of hydrogen bond [39,42,46,75–77]. It is also interesting to note that some reported works [47,56,59,68,69,72,73] in literature showed short response time ( $\leq 30$  s). The literature also reports response times of 5 min  $\leq T_{\text{response}} < 10$  min [51,53,57,60,64,66] and  $\geq 10$  min [50]. While studying recovery time, some works [56,62,68,69] report short recovery time ( $\leq 40$  s). Similarly, there are reports for longer recovery time of 5 min  $\leq T_{\text{recovery}} < 10$  min [57,66,67] and  $\geq 10$  min [50,51,53,55,60,74]

as well. There are cases [58,65] in which the recovery time was longer than response time. Some studies [48,49,64,71] have not reported information on recovery time which is an important observation from the literature.

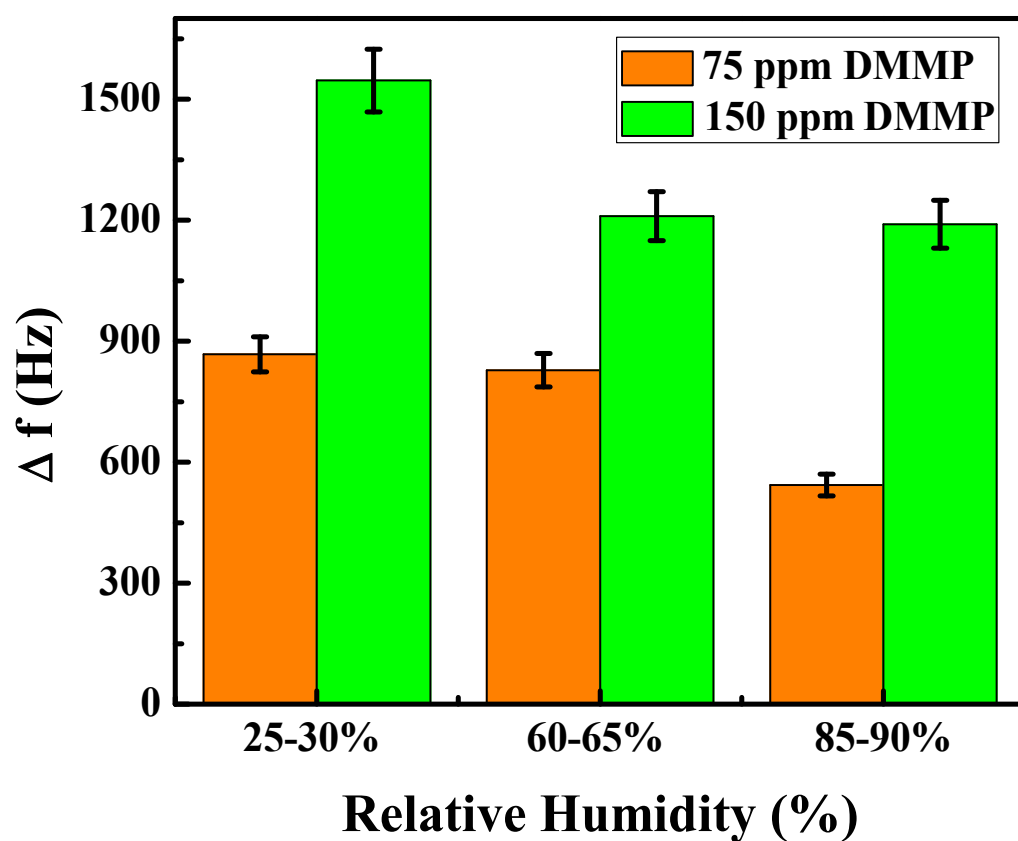

**Figure S18.** The effect of different R.H. conditions on the SAW sensor coated with NGO@MnO<sub>2</sub>/PPy under 25–30, 60–65, and 85–90% R.H. conditions at 20 °C for 75 and 150 ppm DMMP.

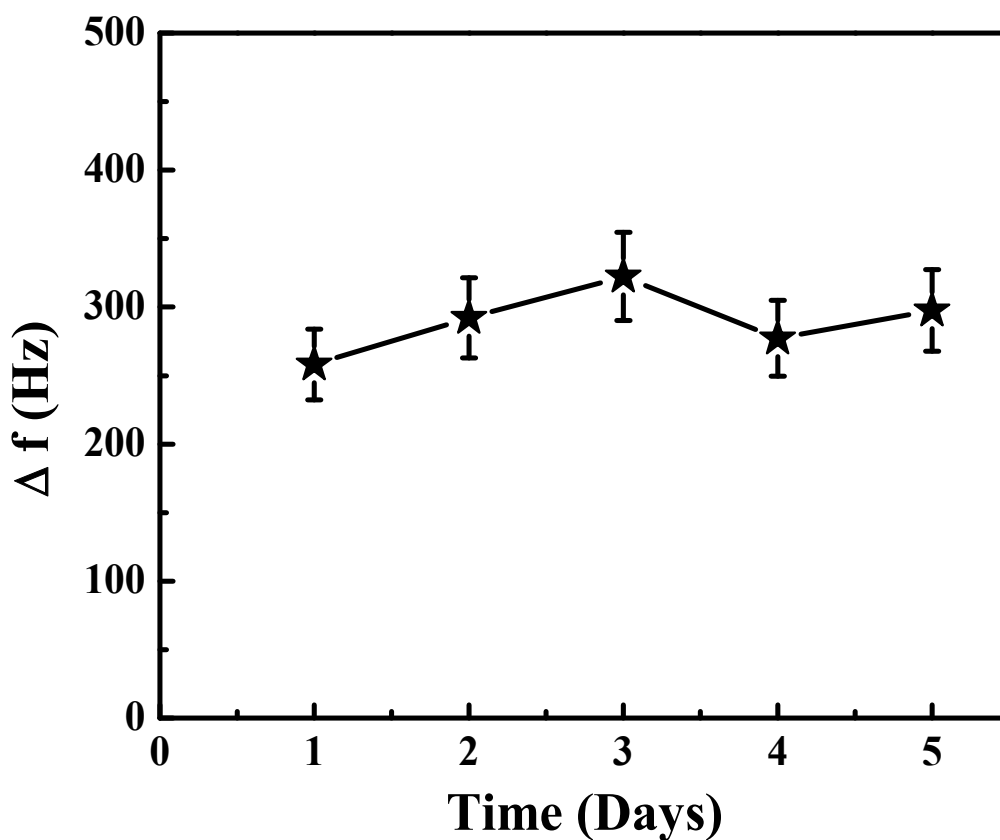

**Figure S19.** The stability test of NGO@MnO<sub>2</sub>/PPy for the detection of 150 ppm DMMP for five consecutive days.

## References

1. Butrow, A.B.; Buchanan, J.H.; Tevault, D.E. Vapor pressure of organophosphorus nerve agent simulant compounds. *J. Chem. Eng. Data* **2009**, *54*, 1876–1883.
2. Ambrose, D.; Sprake, C.H.S. Thermodynamic properties of organic oxygen compounds XXV. Vapour pressures and normal boiling temperatures of aliphatic alcohols. *J. Chem. Thermodyn.* **1970**, *2*, 631–645.
3. Willingham, C.B.; Taylor, W.J.; Pignocco, J.M.; Rossini, F.D. Vapor pressures and boiling points of some paraffin, alkylcyclopentane, alkylcyclohexane, and alkylbenzene hydrocarbons. *J. Res. Natl. Bur. Stand. (1934)*. **1945**, *35*, 219–244.
4. Yaws, C.L.; Yang, H.C. To estimate vapor pressure easily. *Hydrocarb. Process.* **1989**, 68.
5. Bridgeman, O.C.; Aldrich, E.W. Vapor pressure tables for water. **1964**.
6. Ma, W.; Tang, S.; Wei, Y.; Xie, G. Simple biosensing method to detect DMMP based on QCM transducer and acetylcholine esterase sensitive film. *Micro Nano Lett.* **2017**, *12*, 113–116.
7. Shaik, M.; Rao, V.K.; Ramana, G. V; Halder, M.; Gutch, P.K.; Pandey, P.; Jain, R. p-Hexafluoroisopropanol phenyl functionalized graphene for QCM based detection of dimethyl methylphosphonate, a simulant of the nerve agent sarin. *RSC Adv.* **2018**, *8*, 8240–8245.
8. He, W.; Liu, Z.; Du, X.; Jiang, Y.; Xiao, D. Analytical application of poly {methyl [3-(2-hydroxy-3, 4-difluoro) phenyl] propyl siloxane} as a QCM coating for DMMP detection. *Talanta* **2008**, *76*, 698–702.
9. Zhao, Y.; He, J.; Yang, M.; Gao, S.; Zuo, G.; Yan, C.; Cheng, Z. Single crystal WO<sub>3</sub> nanoflakes as quartz crystal microbalance sensing layer for ultrafast detection of trace sarin simulant. *Anal. Chim. Acta* **2009**, *654*, 120–126.
10. Zhao, Y.; Chen, H.; Wang, X.; He, J.; Yu, Y.; He, H. Flower-like tungsten oxide particles: Synthesis, characterization and dimethyl methylphosphonate sensing properties. *Anal. Chim. Acta* **2010**, *675*, 36–41.
11. Ji, X.; Yao, W.; Peng, J.; Ren, N.; Zhou, J.; Huang, Y. Evaluation of Cu-ZSM-5 zeolites as QCM sensor coatings for DMMP detection. *Sens. Actuators B: Chem.* **2012**, *166*, 50–55.
12. Tasaltin, C.; Gurol, I.; Harbeck, M.; Musluoglu, E.; Ahsen, V.; Ozturk, Z.Z. Synthesis and DMMP sensing properties of fluoroalkoxy and fluoroaryloxy substituted phthalocyanines in acoustic sensors. *Sens. Actuators B: Chem.* **2010**, *150*, 781–787.

13. Zhao, Y.; Du, X.; Wang, X.; He, J.; Yu, Y.; He, H. Effects of F doping on TiO<sub>2</sub> acidic sites and their application in QCM based gas sensors. *Sens. Actuators B: Chem.* **2010**, *151*, 205–211.
14. Findeisen, A.; Wackerlig, J.; Samardzic, R.; Pitkänen, J.; Anttalainen, O.; Dickert, F.L.; Lieberzeit, P.A. Artificial receptor layers for detecting chemical and biological agent mimics. *Sens. Actuators B: Chem.* **2012**, *170*, 196–200.
15. Zhu, Y.; Cheng, Z.; Xiang, Q.; Chen, X.; Xu, J. Synthesis of functionalized mesoporous TiO<sub>2</sub>-SiO<sub>2</sub> with organic fluoroalcohol as high performance DMMP gas sensor. *Sens. Actuators B: Chem.* **2017**, *248*, 785–792.
16. Cao, Y.; Fan, Y.; Ma, Z.; Cheng, Z.; Xiang, Q.; Duan, Z.; Xu, J. Urea-functionalized SBA-15 hybrids: Post-grafting synthesis, high-performance organophosphorus sensing and their response mechanism. *Sens. Actuators B: Chem.* **2018**, *273*, 1162–1169.
17. Xie, H.; Sun, X.X.; Yang, Q.; Wang, J.; Huang, Y. Novel gas sensor based on nano-zeolite films for the nerve agent simulant dimethylmethylphosphonate detection. In Proceedings of the 7th International Conference on Solid-State and Integrated Circuits Technology, Beijing, China, 18–21 October 2004, pp. 1719–1722.
18. Xie, H.; Hu, Q.; Zhou, J.; Huang, Y. The study of nanosized zeolite films in sensor for DMMP gas detection. In Proceedings of the 16th IEEE International Symposium on the Physical and Failure Analysis of Integrated Circuits; Suzhou, China, 6–10 July 2009; pp. 555–558.
19. Huang, J.; Jiang, Y.; Du, X.; Bi, J. A New Siloxane Functional Polymer for Chemical Vapor Sensor. In Proceedings of the 2010 Symposium on Photonics and Optoelectronics, Chengdu, China, 19–21 June 2010; pp. 1–5.
20. Qiao, Q.; Cui, X.; Xu, W.; Li, T.; Wu, Y. Fabrication and Properties of Self-Assembly ZrO<sub>2</sub> Film: In-Suit Detecting Atomized Chemical Warfare Agent Simulator Aqueous Solution With Higher Sensitivity. *IEEE Sens. J.* **2020**, *20*, 12166–12173.
21. Ha, S.; Lee, M.; Seo, H.O.; Song, S.G.; Kim, K.; Park, C.H.; Kim, I.H.; Kim, Y.D.; Song, C. Structural effect of thioureas on the detection of chemical warfare agent simulants. *ACS sensors* **2017**, *2*, 1146–1151.
22. Zheng, Q.; Zhu, Y.; Xu, J.; Cheng, Z.; Li, H.; Li, X. Fluoroalcohol and fluorinated-phenol derivatives functionalized mesoporous SBA-15 hybrids: High-performance gas sensing toward nerve agent. *J. Mater. Chem.* **2012**, *22*, 2263–2270.
23. Ramesh, S.; Lee, Y.-J.; Msolli, S.; Kim, J.-G.; Kim, H.S.; Kim, J.-H. Synthesis of a Co<sub>3</sub>O<sub>4</sub>@ gold/MWCNT/polypyrrole hybrid composite for DMMP detection in chemical sensors. *RSC Adv.* **2017**, *7*, 50912–50919.
24. Chung, Y.K.; Ha, S.; Woo, T.G.; Kim, Y.D.; Song, C.; Kim, S.K. Binding thiourea derivatives with dimethyl methylphosphonate for sensing nerve agents. *RSC Adv.* **2019**, *9*, 10693–10701.
25. Du, X.; Wang, Z.; Huang, J.; Tao, S.; Tang, X.; Jiang, Y. A new polysiloxane coating on QCM sensor for DMMP vapor detection. *J. Mater. Sci.* **2009**, *44*, 5872–5876.
26. Fan, G.; Wang, Y.; Hu, M.; Luo, Z.; Li, G. Synthesis of flowerlike nano-SnO<sub>2</sub> and a study of its gas sensing response. *Meas. Sci. Technol.* **2011**, *22*, 45203.
27. Guo, S.B.; Cheng, Z.X.; Zhu, H.Y.; Wang, L.Y.; Zhou, C.H. Hydrogen-bond acid group functionalized mesoporous-silica MCM-41 as sensing material to detect trace level organophosphorus vapor. In Proceedings of the Advanced Materials Research; *Trans. Tech. Publ.*, **2015**; *1092*, 780–783.
28. Kösemen, A.; Öztürk, S.; Şen, Z.; Kösemen, Z.A.; Harbeck, M.; Öztürk, Z.Z. Volatile organic compounds and dimethyl methyl phosphonate (DMMP) sensing properties of the metal oxide functionalized QCM transducers at room temperature. *J. Electrochem. Soc.* **2017**, *164*, B657.
29. Lee, Y.-J.; Kim, G.-H.; Jung, D.; Kim, J.-H. Dimethyl Methylphosphonate Detection Using a Quartz Crystal Microbalance as Chemical Warfare Sensor. *Nanosci. Nanotechnol. Lett.* **2015**, *7*, 1015–1018.
30. Lee, Y.-J.; Kim, J.-G.; Kim, J.-H.; Yun, J.; Jang, W.J. Detection of Dimethyl Methylphosphonate (DMMP) Using Polyhedral Oligomeric Silsesquioxane (POSS). *J. Nanosci. Nanotechnol.* **2018**, *18*, 6565–6569.
31. Li, W.; Wen, X.Y.; Li, S.M.; Wang, X.; Wang, J.Z.; Tang, H. Determination of DMMP using a polymer coated QCM sensor. In Proceedings of the Advanced Materials Research; *Trans Tech Publ*, 2012; Vol. 542, pp. 959–962.
32. Şen, Z.; Gürol, I.; Gümüş, G.; Musluoğlu, E.; Harbeck, M.; Ahsen, V.; Öztürk, Z.Z. Organophosphate sensing with vic-dioximes using QCM sensors. In Proceedings of the SENSORS, 2010 IEEE; IEEE, 2010; pp. 2127–2130.
33. Pei, Z.; Ma, X.; Ding, P.; Zhang, W.; Luo, Z.; Li, G. Study of a QCM dimethyl methylphosphonate sensor based on a ZnO-modified nanowire-structured manganese dioxide film. *Sensors* **2010**, *10*, 8275–8290.
34. Fan, G.; Wang, Y.; Hu, M.; Luo, Z.; Zhang, K.; Li, G. Template free synthesis of hollow ball-like nano-Fe<sub>2</sub>O<sub>3</sub> and its application to the detection of dimethyl methylphosphonate at room temperature. *Sensors* **2012**, *12*, 4594–4604.
35. Hwang, H.M.; Hwang, E.; Kim, D.; Lee, H. Mesoporous non-stacked graphene-receptor sensor for detecting nerve agents. *Sci. Rep.* **2016**, *6*, 1–8.
36. Hwang, E.; Hwang, H.M.; Shin, Y.; Yoon, Y.; Lee, H.; Yang, J.; Bak, S.; Lee, H. Chemically modulated graphene quantum dot for tuning the photoluminescence as novel sensory probe. *Sci. Rep.* **2016**, *6*, 1–10.
37. Ying, Z.; Jiang, Y.; Du, X.; Xie, G.; Yu, J.; Wang, H. PVDF coated quartz crystal microbalance sensor for DMMP vapor detection. *Sens. Actuators B: Chem.* **2007**, *125*, 167–172.
38. Wang, Y.; Yang, Z.; Hou, Z.; Xu, D.; Wei, L.; Kong, E.S.W.; Zhang, Y. Flexible gas sensors with assembled carbon nanotube thin films for DMMP vapor detection. *Sens. Actuators B: Chem.* **2010**, *150*, 708–714.



39. Yoon, H.; Jang, J. Conducting-polymer nanomaterials for high-performance sensor applications: Issues and challenges. *Adv. Funct. Mater.* **2009**, *19*, 1567–1576.
40. Hatchett, D.W.; Josowicz, M. Composites of intrinsically conducting polymers as sensing nanomaterials. *Chem. Rev.* **2008**, *108*, 746–769.
41. Geng, L.; Wu, S. Preparation, characterization and gas sensitivity of polypyrrole/ $\gamma$ -Fe<sub>2</sub>O<sub>3</sub> hybrid materials. *Mater. Res. Bull.* **2013**, *48*, 4339–4343.
42. Hamilton, S.; Hepher, M.J.; Sommerville, J. Polypyrrole materials for detection and discrimination of volatile organic compounds. *Sens. Actuators B: Chem.* **2005**, *107*, 424–432.
43. Joulazadeh, M.; Navarchian, A.H. Ammonia detection of one-dimensional nano-structured polypyrrole/metal oxide nanocomposites sensors. *Synth. Met.* **2015**, *210*, 404–411.
44. Kwon, O.S.; Park, C.S.; Park, S.J.; Noh, S.; Kim, S.; Kong, H.J.; Bae, J.; Lee, C.-S.; Yoon, H. Carboxylic acid-functionalized conducting-polymer nanotubes as highly sensitive nerve-agent chemiresistors. *Sci. Rep.* **2016**, *6*, 1–7.
45. Lama, S.; Kim, J.; Ramesh, S.; Lee, Y.-J.; Kim, J.; Kim, J.-H. Highly Sensitive Hybrid Nanostructures for Dimethyl Methyl Phosphonate Detection. *Micromachines* **2021**, *12*, 648.
46. Haghighi, E.; Zeinali, S. Nanoporous MIL-101 (Cr) as a sensing layer coated on a quartz crystal microbalance (QCM) nanosensor to detect volatile organic compounds (VOCs). *RSC Adv.* **2019**, *9*, 24460–24470.
47. Du, X.; Ying, Z.; Jiang, Y.; Liu, Z.; Yang, T.; Xie, G. Synthesis and evaluation of a new polysiloxane as SAW sensor coatings for DMMP detection. *Sens. Actuators B: Chem.* **2008**, *134*, 409–413.
48. Chevallier, E.; Scorsone, E.; Bergonzo, P. New sensitive coating based on modified diamond nanoparticles for chemical SAW sensors. *Sens. Actuators B: Chem.* **2011**, *154*, 238–244.
49. Joo, B.-S.; Huh, J.-S.; Lee, D.-D. Fabrication of polymer SAW sensor array to classify chemical warfare agents. *Sens. Actuators B: Chem.* **2007**, *121*, 47–53.
50. Wen, W.; Shitang, H.; Shunzhou, L.; Minghua, L.; Yong, P. Enhanced sensitivity of SAW gas sensor coated molecularly imprinted polymer incorporating high frequency stability oscillator. *Sens. Actuators B: Chem.* **2007**, *125*, 422–427.
51. Matatagui, D.; Martí, J.; Fernández, M.J.; Fontecha, J.L.; Gutiérrez, J.; Gràcia, I.; Cané, C.; Horrillo, M.C. Chemical warfare agents simulants detection with an optimized SAW sensor array. *Sens. Actuators B: Chem.* **2011**, *154*, 199–205.
52. Matatagui, D.; Fernandez, M.J.; Fontecha, J.; Santos, J.P.; Gràcia, I.; Cané, C.; Horrillo, M.C. Love-wave sensor array to detect, discriminate and classify chemical warfare agent simulants. *Sens. Actuators B: Chem.* **2012**, *175*, 173–178.
53. Raj, V.B.; Singh, H.; Nimal, A.T.; Sharma, M.U.; Gupta, V. Oxide thin films (ZnO, TeO<sub>2</sub>, SnO<sub>2</sub>, and TiO<sub>2</sub>) based surface acoustic wave (SAW) E-nose for the detection of chemical warfare agents. *Sens. Actuators B: Chem.* **2013**, *178*, 636–647.
54. Singh, H.; Raj, V.B.; Kumar, J.; Mittal, U.; Mishra, M.; Nimal, A.T.; Sharma, M.U.; Gupta, V. Metal oxide SAW E-nose employing PCA and ANN for the identification of binary mixture of DMMP and methanol. *Sens. Actuators B: Chem.* **2014**, *200*, 147–156.
55. Raj, V.B.; Singh, H.; Nimal, A.T.; Tomar, M.; Sharma, M.U.; Gupta, V. Origin and role of elasticity in the enhanced DMMP detection by ZnO/SAW sensor. *Sens. Actuators B: Chem.* **2015**, *207*, 375–382.
56. Pan, Y.; Zhang, G.; Guo, T.; Liu, X.; Zhang, C.; Yang, J.; Cao, B.; Zhang, C.; Wang, W. Environmental characteristics of surface acoustic wave devices for sensing organophosphorus vapor. *Sens. Actuators B: Chem.* **2020**, *315*, 127986.
57. Grabka, M.; Jasek, K.; Pasternak, M. Application of polymethyl [4-(2, 3-difluoro-4-hydroxyphenoxy) butyl] siloxane in surface acoustic wave gas sensors for dimethyl methylphosphonate detection. *Sens. Actuators B: Chem.* **2021**, *329*, 129216.
58. Singh, H.; Raj, V.B.; Kumar, J.; Durani, F.; Mishra, M.; Nimal, A.T.; Sharma, M.U. SAW mono sensor for identification of harmful vapors using PCA and ANN. *Process. Saf. Environ. Prot.* **2016**, *102*, 577–588.
59. Islam, T.; Mittal, U.; Nimal, A.T.; Sharma, M.U. Surface Acoustic Wave (SAW) vapour sensor using 70 MHz SAW oscillator. In Proceedings of the 2012 Sixth International Conference on Sensing Technology (ICST); IEEE, 2012; pp. 112–114.
60. Chen, G.; Xie, X.; Wang, W.; He, S. An experimental research of love wave sensor based on LiTaO<sub>3</sub>/SiO<sub>2</sub> structure. In Proceedings of the Proceedings of the 2014 Symposium on Piezoelectricity, Acoustic Waves, and Device Applications; Beijing, China, 30 October–2 November 2014; pp. 1–4.
61. Qi, X.; Liu, J.; Liang, Y.; Li, J.; He, S. The response mechanism of surface acoustic wave gas sensors in real time. *Jpn. J. Appl. Phys.* **2019**, *58*, 14001.
62. Wang, Y.; Du, X.; Long, Y.; Tang, X.; Tai, H.; Jiang, Y. The response comparison of a hydrogen-bond acidic polymer to sarin, soman and dimethyl methyl phosphonate based on a surface acoustic wave sensor. *Anal. Methods* **2014**, *6*, 1951–1955.
63. Cao, B.Q.; Huang, Q. Bin; Pan, Y.; Qin, M.L. The Respond Characteristic Property in Different temperatures of SAW Sensor with p-tertbutylcalix [4] arene Coatings to Detect DMMP. In Proceedings of the *Adv. Mater. Res.* **2014**, *1015*, 590–593.
64. Hartmann-Thompson, C.; Hu, J.; Kaganove, S.N.; Keinath, S.E.; Keeley, D.L.; Dvornic, P.R. Hydrogen-bond acidic hyperbranched polymers for surface acoustic wave (SAW) sensors. *Chem. Mater.* **2004**, *16*, 5357–5364.
65. Pan, Y.; Guo, T.; Zhang, G.; Yang, J.; Yang, L.; Cao, B. Detection of organophosphorus compounds using a surface acoustic wave array sensor based on supramolecular self-assembling imprinted films. *Anal. Methods* **2020**, *12*, 2206–2214.
66. Hartmann-Thompson, C.; Keeley, D.L.; Voit, B.; Eichhorn, K.; Mikhaylova, Y. Hyperbranched polyesters with internal and exo-presented hydrogen-bond acidic sensor groups for surface acoustic wave sensors. *J. Appl. Polym. Sci.* **2008**, *107*, 1401–1406.

- 
67. Kim, E.; Kim, J.; Ha, S.; Song, C.; Kim, J.-H. Improved Performance of Surface Acoustic Wave Sensors by Plasma Treatments for Chemical Warfare Agents Monitoring. *J. Nanosci. Nanotechnol.* **2020**, *20*, 7145–7150.
  68. Xu, S.; Zhang, R.; Cui, J.; Liu, T.; Sui, X.; Han, M.; Zheng, F.; Hu, X. Surface Acoustic Wave DMMP Gas Sensor with a Porous Graphene/PVDF Molecularly Imprinted Sensing Membrane. *Micromachines* **2021**, *12*, 552.
  69. Wang, W.; He, S.; Li, S.; Liu, M.; Pan, Y. Advances in SXFA-coated SAW chemical sensors for organophosphorous compound detection. *Sensors* **2011**, *11*, 1526–1541.
  70. Long, Y.; Wang, Y.; Du, X.; Cheng, L.; Wu, P.; Jiang, Y. The different sensitive behaviors of a hydrogen-bond acidic polymer-coated SAW sensor for chemical warfare agents and their simulants. *Sensors* **2015**, *15*, 18302–18314.
  71. Dinca, V.; Viespe, C.; Brajnicov, S.; Constantinoiu, I.; Moldovan, A.; Bonciu, A.; Toader, C.N.; Ginghina, R.E.; Grigoriu, N.; Dinescu, M. MAPLE assembled acetylcholinesterase–polyethylenimine hybrid and multilayered interfaces for toxic gases detection. *Sensors* **2018**, *18*, 4265.
  72. Kim, J.; Park, H.; Kim, J.; Seo, B.-I.; Kim, J.-H. SAW Chemical Array Device Coated with Polymeric Sensing Materials for the Detection of Nerve Agents. *Sensors* **2020**, *20*, 7028.
  73. Wang, Y.; Du, X.; Li, Y.; Long, Y.; Qiu, D.; Tai, H.; Tang, X.; Jiang, Y. A simple route to functionalize siloxane polymers for DMMP sensing. *J. Appl. Polym. Sci.* **2013**, *130*, 4516–4520.
  74. Nieuwenhuizen, M.S.; Harteveld, J.L.N. A surface acoustic wave gas sensor for organophosphorus compounds. *Sens. Actuators B: Chem.* **1994**, *19*, 502–505.
  75. Sayago, I.; Matatagui, D.; Fernández, M.J.; Fontecha, J.L.; Jurewicz, I.; Garriga, R.; Muñoz, E. Graphene oxide as sensitive layer in Love-wave surface acoustic wave sensors for the detection of chemical warfare agent simulants. *Talanta* **2016**, *148*, 393–400.
  76. Segal, S.R.; Suib, S.L.; Tang, X.; Satyapal, S. Photoassisted decomposition of dimethyl methylphosphonate over amorphous manganese oxide catalysts. *Chem. Mater.* **1999**, *11*, 1687–1695.
  77. Collins, G.E.; Buckley, L.J. Conductive polymer-coated fabrics for chemical sensing. *Synth. Met.* **1996**, *78*, 93–101.
